# Supplementary material
Source: Springer Nature journal article supplement (https://www.springermedizin.de/resource/supplementary/12889_2007_1137_MOESM1_ESM.pdf/9502532)
Supplement: MOESM1 [file 9502532]

## Advertisement evaluation form

Who is rating this ad?

Advertisement Identification Number:

Questions in black type should always be answered, but questions in blue should be answered only if relevant according to the introductory question, and otherwise left blank.

### Drug class

For the following drug classes, indicate whether this advertisement advertises a drug from the given class:

|                                    |   |   |
|------------------------------------|---|---|
| Thiazide or thiazide-like diuretic | Y | N |
| Beta blocker                       | Y | N |
| ACE inhibitor                      | Y | N |
| Angiotensin receptor antagonist    | Y | N |
| Calcium channel blocker            | Y | N |
| Other (specify if yes)             | Y | N |

If two or more were chosen, is this an advertisement for:

|                                            |   |   |
|--------------------------------------------|---|---|
| More than one antihypertensive preparation | Y | N |
| A combination preparation                  | Y | N |

### Statistics

Are efficacy statistics presented in this advertisement? Y N

If so, are statistics presented in terms of the following?

|                                                                                     |   |   |
|-------------------------------------------------------------------------------------|---|---|
| Relative risk reduction                                                             | Y | N |
| Absolute risk reduction                                                             | Y | N |
| Numbers needed to treat                                                             | Y | N |
| Numbers needed to harm                                                              | Y | N |
| Survival benefit                                                                    | Y | N |
| Other (specify)                                                                     | Y | N |
| Non-specific (i.e. can't tell from ad, would need to consult reference to find out) | Y | N |

Are measures of statistical significance present in the advertisement? Y N

If so, are statistics presented in terms of the following?

|                                                 |   |   |
|-------------------------------------------------|---|---|
| p value(s)                                      | Y | N |
| Confidence interval(s)                          | Y | N |
| Text only – such as “statistically significant” | Y | N |
| Other (specify)                                 | Y | N |

### Harms

Does the advertisement make any mention of possible harm to health as a consequence of taking the antihypertensive medication(s)? Y N

Are these harms only mentioned in the fine print? Y N

## Cost

- Does the advertisement make any mention of medication costs? Y N
- Does the advertisement state the PBS dispensed price for the medication(s)? Y N
- Does the advertisement give any information on costs or cost-effectiveness beyond stating the PBS dispensed price for the medication(s)? Y N
- Does the advertisement give cost comparisons between this agent and agents of different classes? Y N
- Does the advertisement give cost comparisons between this agent and agents from the same class? Y N

## Statements about hypertension

### Lifestyle factors

Are the following lifestyle factors mentioned in the text (main body or fine print) of the advertisement?

|                                                                                                                                                                    | Main body only | Entire ad, including fine print |
|--------------------------------------------------------------------------------------------------------------------------------------------------------------------|----------------|---------------------------------|
| Weight loss                                                                                                                                                        | Y N            | Y N                             |
| Exercise                                                                                                                                                           | Y N            | Y N                             |
| Dietary salt restriction                                                                                                                                           | Y N            | Y N                             |
| Other dietary modification                                                                                                                                         | Y N            | Y N                             |
| Alcohol use moderation                                                                                                                                             | Y N            | Y N                             |
| Smoking cessation                                                                                                                                                  | Y N            | Y N                             |
| “Lifestyle” factors, unspecified                                                                                                                                   | Y N            | Y N                             |
| Other (specify)                                                                                                                                                    | Y N            | Y N                             |
| If yes to alcohol above, then is alcohol only mentioned in terms of a possible interaction with the drug advertised?                                               | Y N            | Y N                             |
| If yes to salt above, then is salt only mentioned in terms of a possible adverse effect of prescribing the drug to a salt or sodium depleted patient?              | Y N            | Y N                             |
| Is there advice to first trial lifestyle changes (in patients at low or moderate overall cardiovascular risk, or in any patients) before beginning drug treatment? | Y N            | Y N                             |

### Characteristics of the patient

- Does the advertisement promote the drug or state the drug is indicated for “high blood pressure”, “hypertension”, or “essential hypertension” without qualification as to other patient characteristics? Y N
- Does the text in the main body of the advertisement promote the drug for a particular subset of patients? Y N
- If so, then in which of the following specific subgroups: Y N
- Secondary prevention of coronary artery disease Y N

|                                                                                      |   |   |
|--------------------------------------------------------------------------------------|---|---|
| Hypertension plus coronary artery disease                                            | Y | N |
| Secondary prevention of cerebrovascular disease                                      | Y | N |
| Hypertension plus cerebrovascular disease                                            | Y | N |
| Isolated systolic hypertension                                                       | Y | N |
| Diabetes                                                                             | Y | N |
| Diabetes plus hypertension                                                           | Y | N |
| Diabetes plus one additional cardiovascular risk factor (as per HOPE study criteria) | Y | N |
| Prevention of progression of renal failure in patients with proteinuria              | Y | N |
| Patients uncontrolled on monotherapy                                                 | Y | N |
| Other (specify if yes)                                                               | Y | N |

### Cardiovascular risk

Does the advertisement make claims that its product reduces risk or danger or harm?  
Y N

If so, then are these risks or dangers or harms specifically characterised as cardiovascular events (angina, MI, TIA, CVA or similar)?  
Y N

Does the advertisement explicitly suggest or promote the assessment, measurement or estimation of the patient's overall cardiovascular risk?  
Y N

Other than comments on drug interactions, is any recommendation given to considering pharmacological treatments to lower cardiovascular risk other than antihypertensive drugs?  
Y N

If so, which treatments:

|                        |   |   |
|------------------------|---|---|
| Aspirin                | Y | N |
| Lipid-lowering therapy | Y | N |
| Treatment of diabetes  | Y | N |
| Other (specify if yes) | Y | N |

### Range of Treatments

Which of the following drug classes are mentioned (or have one or more members of the class mentioned) in the main body text of the advertisement?

|                |   |   |
|----------------|---|---|
| Thiazides      | Y | N |
| Beta-blockers  | Y | N |
| ACE inhibitors | Y | N |
| A2Ras          | Y | N |
| CCBs           | Y | N |

Which of the following drug classes are mentioned (or have one or more members of the class mentioned) anywhere in the advertisement, including fine print?

|                |   |   |
|----------------|---|---|
| Thiazides      | Y | N |
| Beta-blockers  | Y | N |
| ACE inhibitors | Y | N |
| A2Ras          | Y | N |
| CCBs           | Y | N |

Does the advertisement specifically remind the prescriber to consider medications other than

|                                                                                                 |            |         |   |      |
|-------------------------------------------------------------------------------------------------|------------|---------|---|------|
| the advertised agent(s)?                                                                        |            |         | Y | N    |
| If so, does it suggest the other medications in addition to or instead of the advertised agent? |            |         |   |      |
|                                                                                                 | additional | instead |   | both |

**Thiazide issues**

Does the advertisement specifically state that, in the absence of compelling indications for a different agent, drug treatment should start with a low-dose thiazide?      Y   N

If the advertisement promotes a thiazide or thiazide-like agent, does it promote it as a single-agent preparation (i.e. not a combination pill)?      Y   N

If so, then which agent is the advertisement promoting?

|                        |   |   |
|------------------------|---|---|
| Bendrofluazide         | Y | N |
| Hydrochlorothiazide    | Y | N |
| Chlorthalidone         | Y | N |
| Indapamide             | Y | N |
| Other (specify if yes) | Y | N |

If promoting a combination therapy for hypertension, does the combination include a thiazide or thiazide-like agent?      Y   N

If so, is this:

|                        |   |   |
|------------------------|---|---|
| Bendrofluazide         | Y | N |
| Hydrochlorothiazide    | Y | N |
| Chlorthalidone         | Y | N |
| Indapamide             | Y | N |
| Other (specify if yes) | Y | N |
